# Supplementary material for: Role of Persistent Organic Pollutants in Breast Cancer Progression and Identification of Estrogen Receptor Alpha Inhibitors Using In-Silico Mining and Drug-Drug Interaction Network Approaches
Source: MDPI journal article supplement (doi:10.3390/biology10070681), 2021-07-19
Supplement: s1 [file s1]

## Docking validation

We performed docking on ER alpha. First, we performed docking validation on *ER alpha*. The reliability of docking accuracy was assessed in two steps. In the first step re-docking of the native ligand was performed. While, in the second step, cross-docking experiment was carried out. Three-dimensional structures of eight ER alpha enzymes were retrieved from PDB. For every available structure, each native ligand was docked.

### 1. Self-docking on *ERα*

Validation of the docking protocol was carried out using re-dock procedure. All the native ligands were extracted and redocked into corresponding enzyme. The root means square deviation (RMSD) was calculated for the each re-docked and experimental native ligand. Triangle Matcher place algorithm with Affinity *dG* scoring function for all the simulation was found best. Final score function was computed with GBVI/WAS *dG* score function in the rigid receptor protocol.

**Table S1.** Results of re-docking of native inhibitors.

| PDB ID | RMSD (Å)* |
|--------|-----------|
| 1A52   | 0.69      |
| 3ERT   | 1.65      |
| 1GWQ   | 0.98      |
| 1UOM   | 1.01      |
| 5W9D   | 0.97      |

\* Green box = Good pose; Yellow box = close pose.

### 2. Cross docking on *hDHFR*

Cross-docking experiment was performed in the next step. Three-dimensional structures of five ERα were retrieved from PDB. For every available structure, each native ligand was docked. The quality of docking accuracy / docking pose was assessed with the following RMSD values range.

- ≤ 1.10 = Good pose (Green box)
- < 1.11-1.90 = close pose (yellow box)
- ≥ 2.00 bad pose (Red box)

**Table S2.** Cross-docking results for various PDB IDs from ERα.

|      | RMSD (Å) |      |      |      |      |
|------|----------|------|------|------|------|
|      | 1A52     | 3ERT | 1GWQ | 1UOM | 5W9D |
| 1A52 | 0.69     | 0.96 | 0.98 | 0.82 | 0.99 |
| 3ERT | 1.18     | 0.91 | 1.48 | 1.28 | 1.01 |
| 1GWQ | 1.18     | 1.57 | 1.36 | 0.78 | 1.36 |
| 1UOM | 1.18     | 1.97 | 1.82 | 1.06 | 2.13 |
| 5W9D | 1.09     | 1.15 | 1.04 | 0.84 | 1.04 |

≤ 1.10 = Good pose (Green box); < 1.11-1.90 = close pose (yellow box); ≥ 2.00 bad pose (Red box).

The results shown in **Table S2** indicates that docking simulations carried out on 3-D structures in complex with different ligand had only about 64 % of chance of reliable pose. It is revealed from the cross-docking experiment that for 1A52 and 5W9D, it is possible to dock five ligands with RMSD range of 0.81-1.37 Å. Furthermore, the native ligand of 1DLS is MTX that has structural similarity with our synthesized ligands.

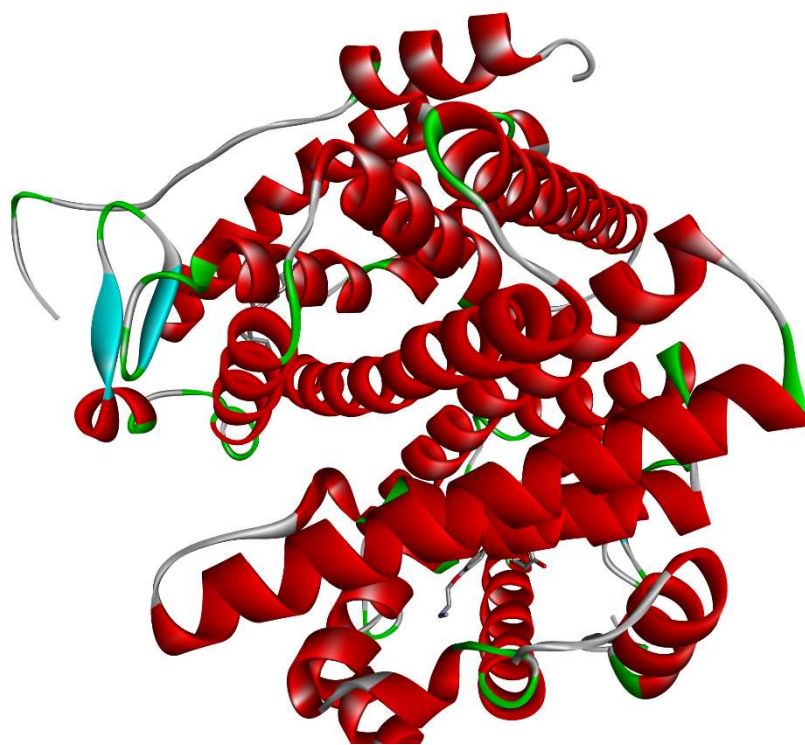

**Figure S1.** Structure of estrogen receptor alpha (ERα/pdb id=5W9D) protein.

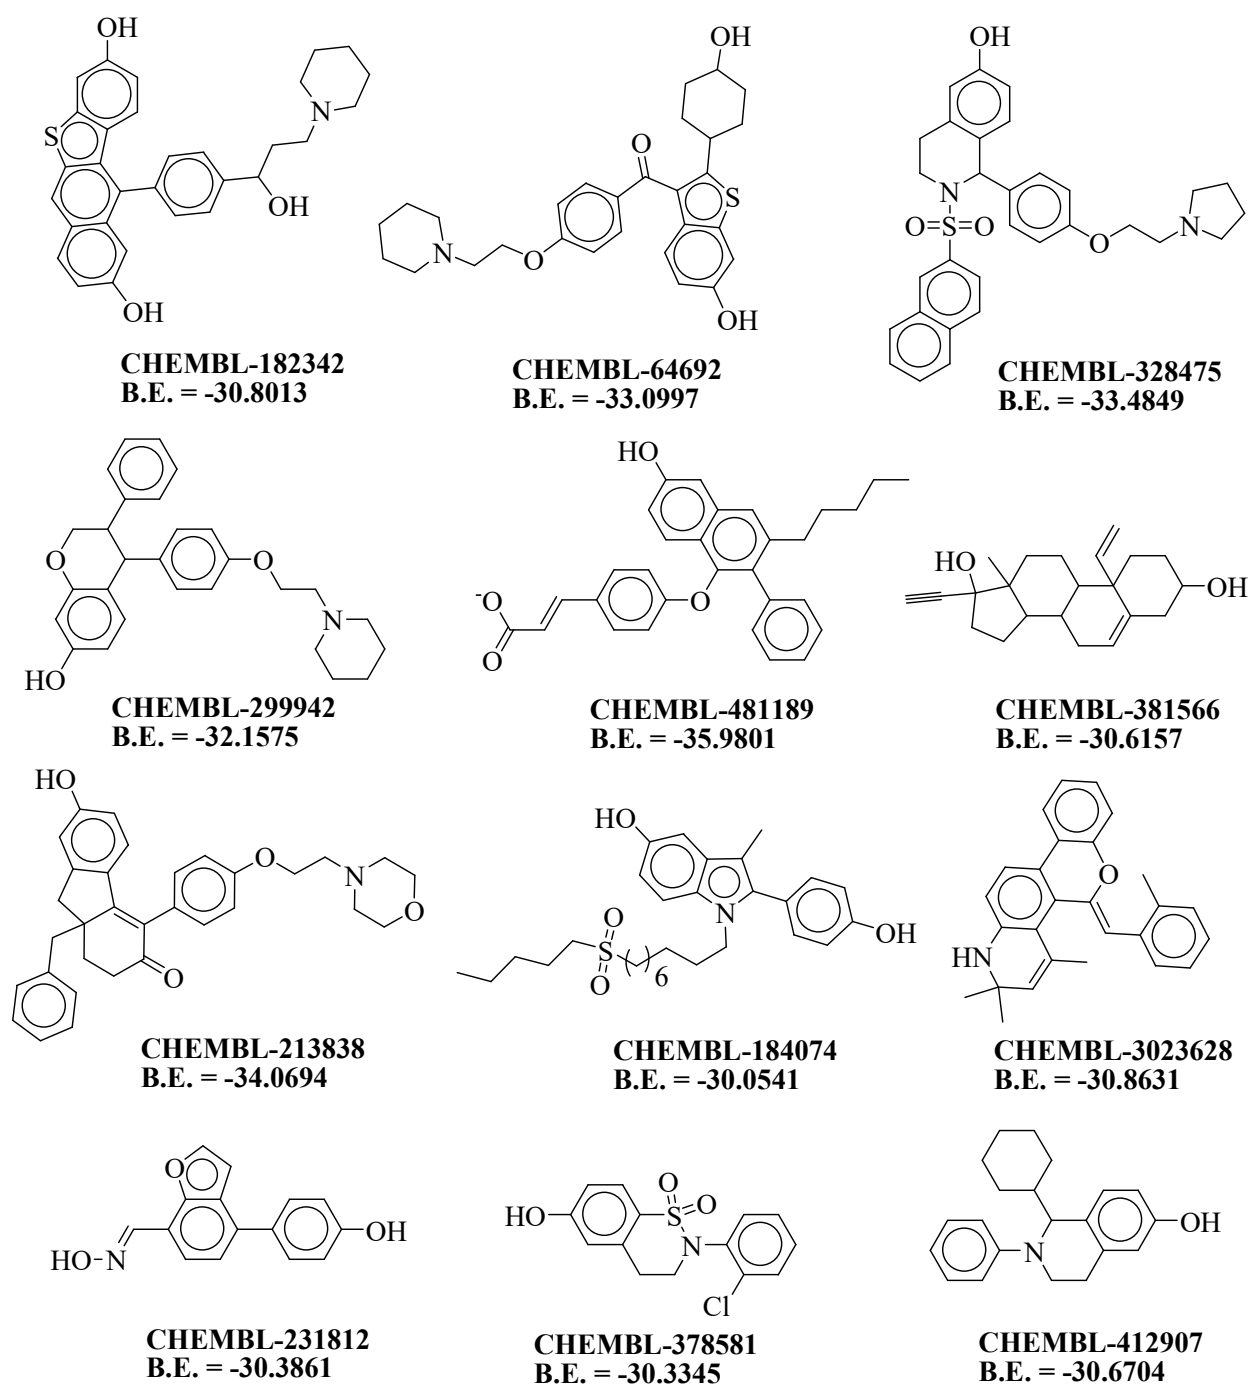

**Figure S2.** Chemical structures and binding energies (B.E. in kcal/mol) of the active compounds obtained from ChEMBL.

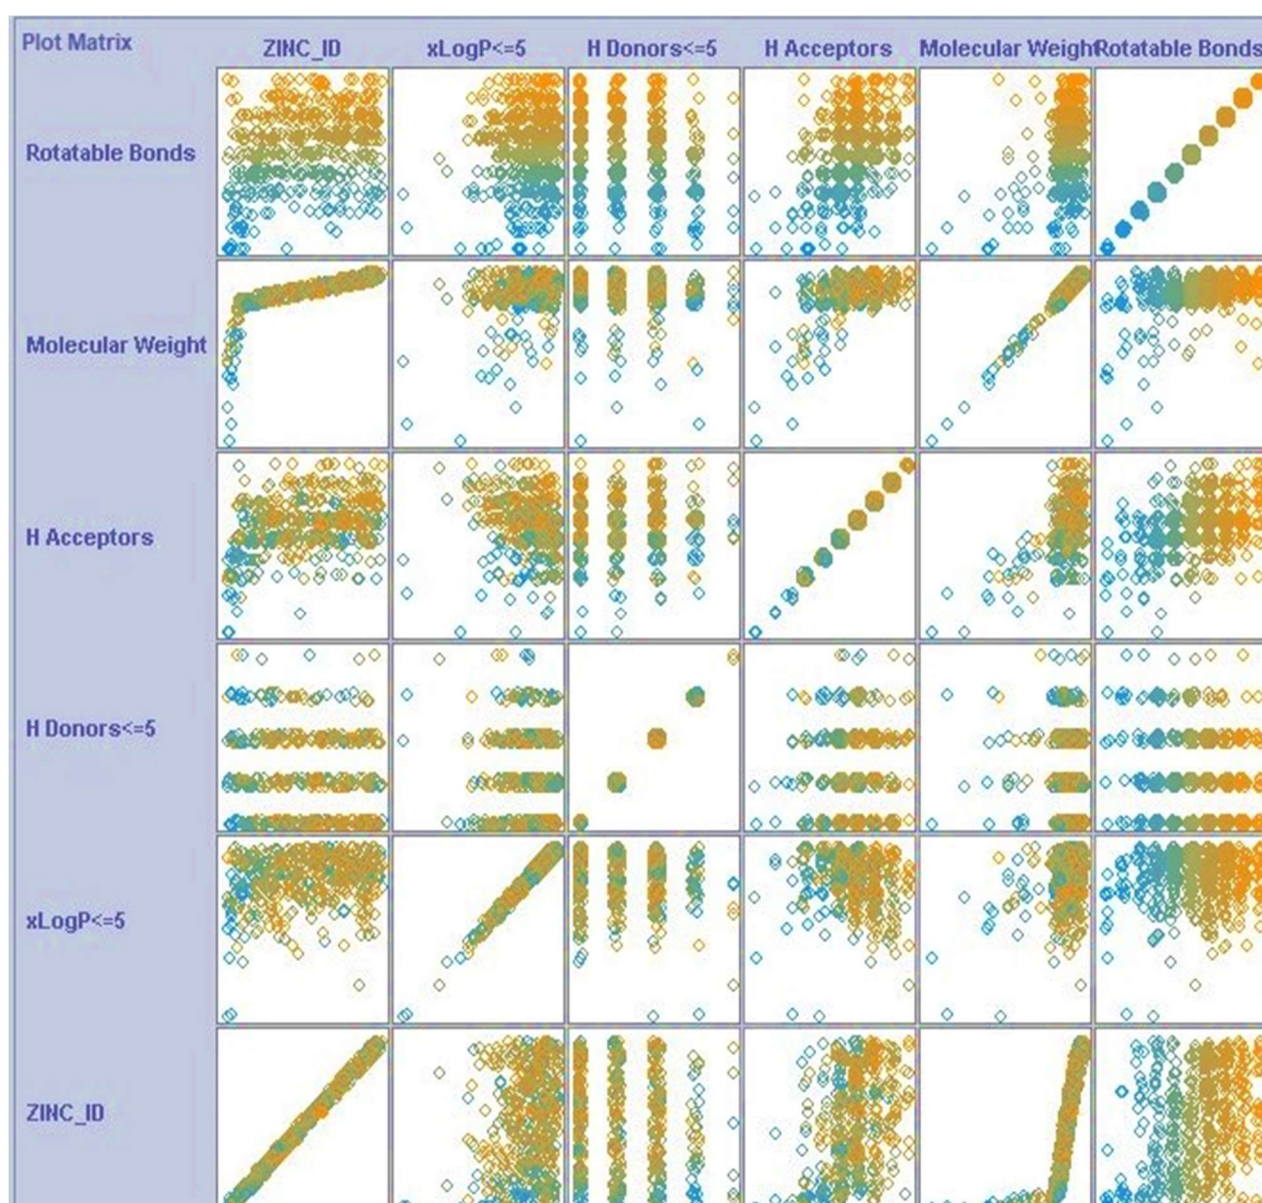

Figure S3. Plot matrix representation of drug compounds with their attributes.

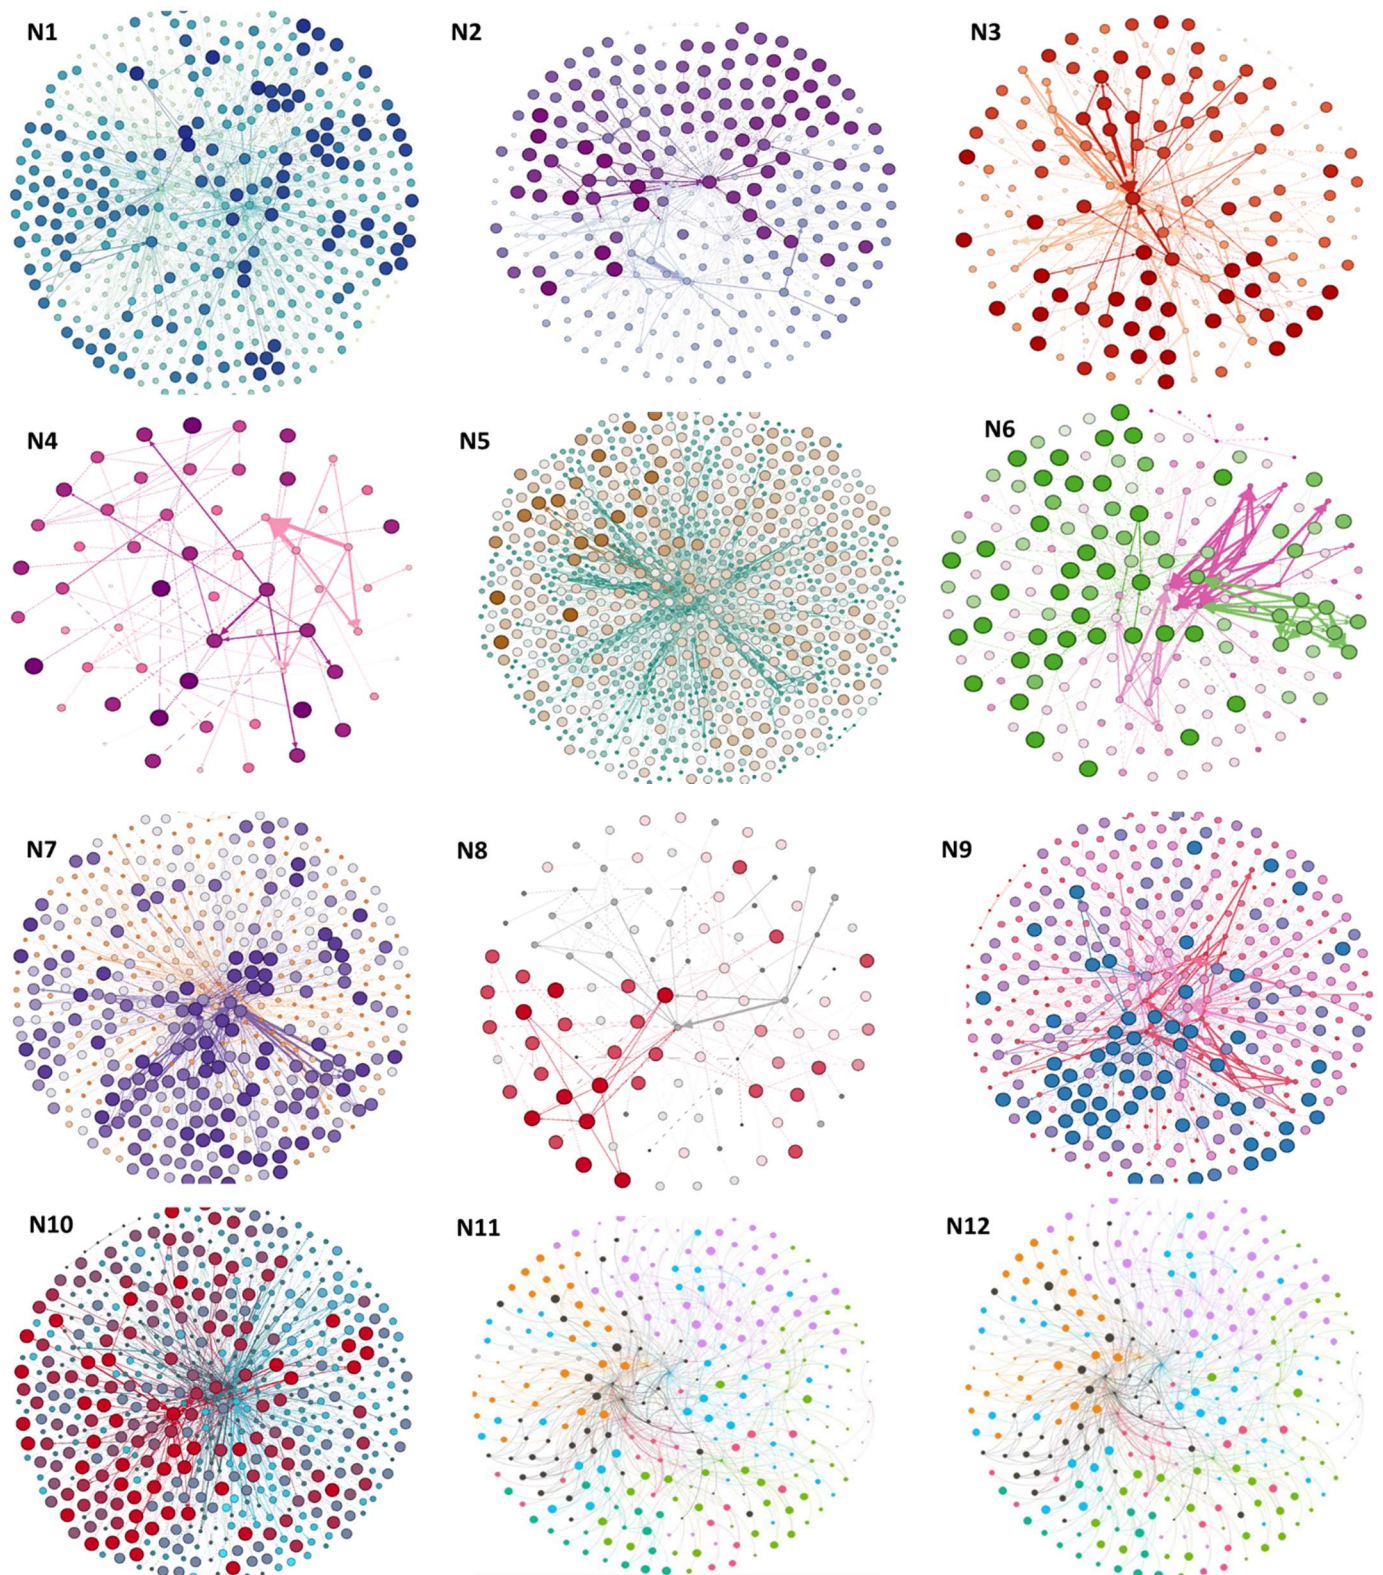

Figure S4. DDI networks generated using K means clustering algorithm and Gephi tool.
